# Supplementary material for: CDCA5 functions as a tumor promoter in bladder cancer by dysregulating mitochondria-mediated apoptosis, cell cycle regulation and PI3k/AKT/mTOR pathway activation
Source: PubMed Central journal article supplement (PMC7066009; doi:10.7150/jca.35372), 2020-02-10
Supplement: jcav11p2408s1.pdf [file jcav11p2408s1.pdf]

Supplementary Table S1: Baseline characteristics of the 20 BC patients

| Patient ID | Sex | Age | BMI  | Smoking History | Drinking History | Hematuria | Urine Leucocyte (/μL) | Urine Bacterium (/μL) | Serum creatinine (μmol/L) | Serum urea (mmol/L) | Serum uric acid (μmol/L) |
|------------|-----|-----|------|-----------------|------------------|-----------|-----------------------|-----------------------|---------------------------|---------------------|--------------------------|
| BC01       | M   | 51  | 22.4 | Current         | Current          | Yes       | 755.8                 | 15.3                  | 105                       | 4.9                 | 325                      |
| BC02       | M   | 60  | 21.8 | Never           | Never            | No        | 86.9                  | 27.5                  | 94                        | 6.9                 | 356                      |
| BC03       | M   | 40  | 21.5 | Current         | Never            | Yes       | 21.6                  | 386.3                 | 126                       | 6.4                 | 422                      |
| BC04       | F   | 59  | 20.5 | Never           | Never            | Yes       | 152.7                 | 271.4                 | 49                        | 5.3                 | 275                      |
| BC05       | M   | 78  | 16.0 | Never           | Never            | Yes       | 70.6                  | 36.9                  | 63                        | 4.4                 | 209                      |
| BC06       | M   | 80  | 20.2 | Never           | Never            | Yes       | 60.3                  | 26.1                  | 318                       | 32.5                | 678                      |
| BC07       | M   | 82  | 24.0 | Never           | Current          | No        | 10.0                  | 720.6                 | 87                        | 4.1                 | 300                      |
| BC08       | M   | 75  | 25.1 | EX              | Never            | Yes       | 154.8                 | 1828.7                | 80                        | 7.8                 | 381                      |
| BC09       | M   | 77  | 19.9 | Never           | Never            | No        | 86.8                  | 14.7                  | 98.0                      | 8.4                 | 123.0                    |

|      |   |    |      |         |         |     |        |       |       |      |       |
|------|---|----|------|---------|---------|-----|--------|-------|-------|------|-------|
| BC10 | M | 79 | 19.4 | Current | Never   | Yes | 1653.9 | 378.8 | 128.0 | 11.0 | 340.0 |
| BC11 | F | 56 | 22.0 | Never   | Never   | No  | 5.8    | 6.6   | 110.0 | 6.6  | 341.0 |
| BC12 | M | 62 | 25.3 | Never   | Current | No  | 86.5   | 46.5  | 74    | 5.3  | 422   |
| BC13 | F | 65 | 27.0 | Never   | Never   | Yes | 79.8   | 103.7 | 103   | 9.3  | 525   |
| BC14 | M | 80 | 19.8 | Never   | Never   | Yes | 1134.4 | 854.7 | 132   | 6.96 | 377   |
| BC15 | M | 69 | 20.0 | Never   | Never   | Yes | 68.4   | 10.7  | 79    | 2.92 | 102   |
| BC16 | F | 74 | 20.8 | Never   | Never   | Yes | 1.5    | 24.1  | 85    | 9.31 | 335   |
| BC17 | M | 79 | 26.7 | Never   | Never   | Yes | 17.7   | 2.6   | 134   | 8.89 | 249   |
| BC18 | M | 60 | 20.8 | Current | Never   | No  | 39.2   | 9.3   | 70    | 6.19 | 326   |
| BC19 | M | 74 | 21.6 | Current | Current | Yes | 42.3   | 37.5  | 88    | 8.79 | 376   |
| BC20 | M | 58 | 19.5 | Current | Current | Yes | 194.8  | 83.8  | 87    | 8.27 | 264   |

**Supplementary Table S2: Clinicopathologic parameters of the 20 BC patients**

| Patient Id | Recurrence | Multifocality | Invasiveness | Grading | Tumor Size | Cystoscopy Findings                 |
|------------|------------|---------------|--------------|---------|------------|-------------------------------------|
| BC01       | No         | Yes           | Yes          | G3      | <2cm       | Cauliflower-appearance tumor        |
| BC02       | Yes        | No            | Yes          | G1      | ≥2cm       | Cauliflower-appearance tumor        |
| BC03       | No         | No            | Yes          | G3      | <2cm       | Carpet-like swollen lesion          |
| BC04       | No         | No            | Yes          | G3      | ≥2cm       | Broad base tumor                    |
| BC05       | No         | Yes           | Yes          | G3      | ≥2cm       | Broad base papillary swollen lesion |
| BC06       | No         | Yes           | Yes          | G3      | ≥2cm       | Cauliflower-appearance tumor        |
| BC07       | Yes        | NA            | Yes          | G2      | NA         | -                                   |
| BC08       | Yes        | No            | Yes          | G3      | <2cm       | Cauliflower-appearance tumor        |
| BC09       | No         | NA            | Yes          | G3      | NA         | -                                   |
| BC10       | Yes        | NA            | Yes          | G3      | ≥2cm       | Cauliflower-appearance tumor        |
| BC11       | No         | No            | Yes          | G3      | NA         | -                                   |
| BC12       | Yes        | No            | Yes          | G3      | ≥2cm       | Cauliflower-appearance tumor        |

|      |     |     |     |    |      |                                         |
|------|-----|-----|-----|----|------|-----------------------------------------|
| BC13 | No  | No  | Yes | G3 | NA   | -                                       |
| BC14 | No  | No  | Yes | G3 | ≥2cm | Broad base cauliflower-appearance tumor |
| BC15 | No  | Yes | Yes | G3 | ≥2cm | Cauliflower-appearance tumor            |
| BC16 | No  | No  | Yes | G3 | ≥2cm | Broad base tumor                        |
| BC17 | Yes | No  | Yes | G3 | ≥2cm | Swollen lesion                          |
| BC18 | No  | No  | Yes | G3 | ≥2cm | Broad base irregular swollen lesion     |
| BC19 | No  | Yes | Yes | G3 | ≥2cm | Multiple papillary tumors               |
| BC20 | No  | No  | Yes | G3 | ≥2cm | Tumor like follicular hyperplasia       |
